# Supplementary material for: Impact of Change in Body Composition during Follow-Up on the Survival of GEP-NET
Source: MDPI journal article supplement (doi:10.3390/cancers14215189), 2022-10-22
Supplement: s1 [file s1]

**Correlations of somatostatin analogues and body composition.**

| Measure (cm <sup>2</sup> /m <sup>2</sup> ) | Overall          | Not somatostatin analogues | Somatostatin analogues | p value | Test                  |
|--------------------------------------------|------------------|----------------------------|------------------------|---------|-----------------------|
| Total body area                            | 262.085 (64.196) | 270.093 (68.595)           | 245.569 (51.099)       | 0.0508  | T-test                |
| Subcutaneous fat area                      | 66.918 (32.882)  | 69.68 (35.727)             | 61.223 (25.631)        | 0.3899  | Mann-Whitney wilcoxon |
| Visceral fat area                          | 61.346 (38.857)  | 66.928 (39.165)            | 49.834 (36.127)        | 0.0168  | Mann-Whitney wilcoxon |
| Intermuscular fat area                     | 5.579 (3.825)    | 6.1 (4.181)                | 4.505 (2.714)          | 0.0272  | Mann-Whitney wilcoxon |
| Total fat area                             | 133.844 (59.289) | 142.709 (60.824)           | 115.562 (52.245)       | 0.0254  | T-test                |
| Very low density muscle area               | 4.864 (2.74)     | 5.207 (2.903)              | 4.156 (2.249)          | 0.0567  | Mann-Whitney wilcoxon |
| Low density muscle area                    | 13.225 (5.331)   | 13.674 (5.335)             | 12.297 (5.285)         | 0.2324  | T-test                |
| Normal density muscle area                 | 23.759 (8.002)   | 23.206 (7.526)             | 24.899 (8.922)         | 0.359   | T-test                |
| Total muscle area                          | 42.36 (7.561)    | 42.626 (7.326)             | 41.812 (8.117)         | 0.6327  | T-test                |

**Correlations of metformin and body composition.**

| Measure (cm <sup>2</sup> /m <sup>2</sup> ) | Overall          | Not metformin   | Metformin        | p value | Test                  |
|--------------------------------------------|------------------|-----------------|------------------|---------|-----------------------|
| Total body area                            | 262.085 (64.196) | 252.89 (60.527) | 298.124 (60.589) | 0.0107  | T-test                |
| Subcutaneous fat area                      | 66.918 (32.882)  | 67.224 (33.545) | 72.703 (36.294)  | 0.5762  | T-test                |
| Visceral fat area                          | 61.346 (38.857)  | 53.603 (31.685) | 81.591 (45.552)  | 0.0319  | Mann-Whitney wilcoxon |
| Intermuscular fat area                     | 5.579 (3.825)    | 5.432 (4.052)   | 5.796 (3.042)    | 0.4404  | Mann-Whitney wilcoxon |
| Total fat area                             | 133.844 (59.289) | 126.26 (56.53)  | 160.089 (59.544) | 0.0444  | T-test                |
| Very low density muscle area               | 4.864 (2.74)     | 4.575 (2.518)   | 5.697 (3.217)    | 0.2085  | Mann-Whitney wilcoxon |
| Low density muscle area                    | 13.225 (5.331)   | 12.478 (4.772)  | 15.922 (5.675)   | 0.0305  | T-test                |

|                                   |                |                |                |        |                        |
|-----------------------------------|----------------|----------------|----------------|--------|------------------------|
| <b>Normal density muscle area</b> | 23.759 (8.002) | 24.386 (8.135) | 20.896 (7.603) | 0.1058 | T-test                 |
| <b>Total muscle area</b>          | 42.36 (7.561)  | 41.979 (7.467) | 42.924 (8.761) | 0.5191 | Mann- Whitney wilcoxon |

**Correlations of body composition and T2DM.**

| <b>Measures (cm<sup>2</sup>/m<sup>2</sup>)</b> | <b>Overall</b> | <b>No T2DM</b>         | <b>T2DM</b>            | <b>p value</b> | <b>Test</b>            |
|------------------------------------------------|----------------|------------------------|------------------------|----------------|------------------------|
| <b>Total body area</b>                         | 262.05 (64.24) | 251.7895<br>(62.82453) | 275.5544<br>(59.36912) | 0.07663        | T-test                 |
| <b>Subcutaneous fat area</b>                   | 66.59 (33.12)  | 70.44305<br>(34.47183) | 62.95904<br>(32.01727) | 0.1497         | Mann- Whitney wilcoxon |
| <b>Visceral fat area</b>                       | 61.55 (38.72)  | 50.72197<br>(31.29403) | 72.84834<br>(39.37159) | 0.01505        | Mann- Whitney Wilcoxon |
| <b>Intermuscular fat area</b>                  | 133.76 (59.36) | 5.230239<br>(4.155015) | 5.928339<br>(3.094747) | 0.1719         | Mann- Whitney Wilcoxon |
| <b>Total fat area</b>                          | 5.61 (3.82)    | 126.3953<br>(57.78653) | 141.7357<br>(56.92119) | 0.3159         | Mann- Whitney Wilcoxon |
| <b>Very low density muscle area</b>            | 4.88 (2.73)    | 4.342222<br>(2.437471) | 5.509409<br>(2.857705) | 0.06624        | Mann- Whitney Wilcoxon |
| <b>Low density muscle area</b>                 | 13.27 (5.29)   | 12.16497<br>(4.95841)  | 14.59226<br>(4.924284) | 0.06267        | Mann- Whitney Wilcoxon |
| <b>Normal density muscle area</b>              | 23.67 (8.02)   | 24.82547<br>(8.381614) | 21.66515<br>(6.909492) | 0.05621        | T-test                 |
| <b>Total muscle area</b>                       | 42.33 (7.59)   | 41.87893<br>(7.905753) | 42.22696<br>(7.21791)  | 0.45           | Mann- Whitney Wilcoxon |

Type 2 diabetes mellitus and body composition.

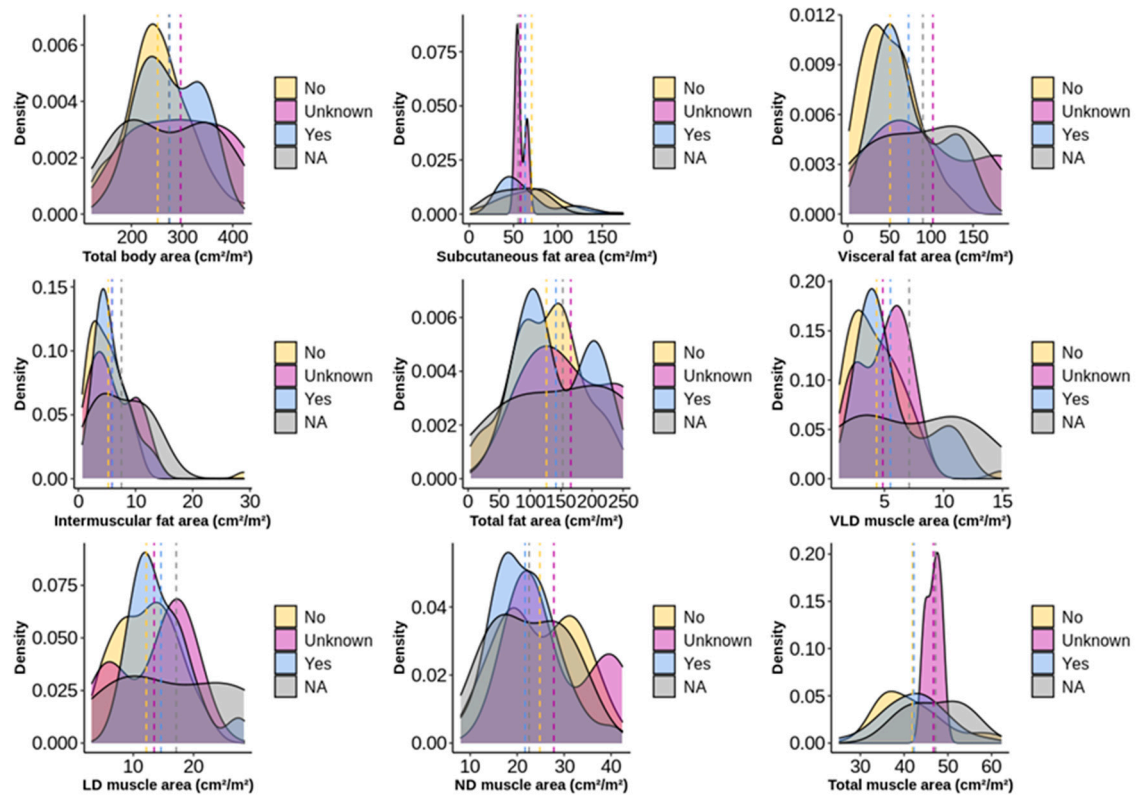

Distribution plots of body composition according to diagnosis of Type 2 Diabetes Mellitus.
